# Supplementary material for: Defense Strategies: The Role of Transcription Factors in Tomato–Pathogen Interaction
Source: MDPI journal article supplement (doi:10.3390/biology11020235), 2022-02-01
Supplement: s1 [file s1]

**Table S1** Number of members of the different families and subfamilies or groups of tomato transcription factors (TFs).

| TF family               | TF subfamily/groups | N° of members |
|-------------------------|---------------------|---------------|
| <b>WRKY</b><br>[96]     | Groups I + IIc      | 33            |
|                         | Groups IIa + IIb    | 15            |
|                         | Groups IIc + IIc    | 23            |
|                         | Group III           | 12            |
|                         | <b>Total</b>        | <b>83</b>     |
| <b>NAC</b><br>[49]      | Groups I            | 20            |
|                         | Groups IIa          | 10            |
|                         | Groups IIb          | 24            |
|                         | Groups IIIa         | 18            |
|                         | Groups IIIb         | 21            |
|                         | <b>Total</b>        | <b>93</b>     |
| <b>AP2/ERF</b><br>[101] | ERF                 | 88            |
|                         | RAV                 | 3             |
|                         | AP2                 | 26            |
|                         | Solost              | 1             |
|                         | DREB                | 40            |
|                         | <b>Total</b>        | <b>167</b>    |
| <b>bHLH</b><br>[66]     | Group 1             | 14            |
|                         | Group 2             | 5             |
|                         | Group 3             | 5             |
|                         | Group 4             | 6             |
|                         | Group 5             | 11            |
|                         | Group 6             | 12            |
|                         | Group 7             | 4             |
|                         | Group 11            | 7             |
|                         | Group 13            | 7             |
|                         | Group 14            | 8             |
|                         | Group 15            | 11            |
|                         | Group 16            | 4             |
|                         | Group 17            | 12            |
|                         | Group 18            | 3             |
|                         | Group 19            | 11            |
|                         | Group 20            | 8             |
|                         | Group 21            | 9             |
|                         | <b>Total</b>        | <b>159</b>    |

| TF family<br>(cont.) | TF subfamily/groups<br>(cont.) | N° of members<br>(cont.) |
|----------------------|--------------------------------|--------------------------|
| <b>bZIP</b><br>[75]  | BZ1                            | 3                        |
|                      | BZ2                            | 2                        |
|                      | BZ3                            | 4                        |
|                      | BZ4                            | 3                        |
|                      | BZ5                            | 2                        |
|                      | BZ6                            | 4                        |
|                      | BZ7                            | 4                        |
|                      | BZ8                            | 2                        |
|                      | BZ9                            | 2                        |
|                      | BZ10                           | 4                        |
|                      | BZ11                           | 2                        |
|                      | BZ12                           | 2                        |
|                      | BZ13                           | 2                        |
|                      | BZ14                           | 3                        |
|                      | BZ15                           | 7                        |
|                      | BZ16                           | 3                        |
|                      | BZ17                           | 3                        |
|                      | BZ18                           | 1                        |
|                      | BZ19                           | 1                        |
|                      | BZ20                           | 1                        |
|                      | BZ21                           | 1                        |
|                      | BZ22                           | 1                        |
|                      | BZ23                           | 1                        |
|                      | BZ24                           | 12                       |
|                      | <b>Total</b>                   | <b>69</b>                |
